# Supplementary material for: Modelling rock glacier ice content based on InSAR-derived velocity, Khumbu and Lhotse valleys, Nepal
Source: Copernicus journal article supplement (doi:10.5194/tc-17-2305-2023), 2023-06-08
Supplement: Supplementary file 1 [file tc-17-2305-2023-supplement.pdf]

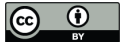

*Supplement of*

## **Modelling rock glacier ice content based on InSAR-derived velocity, Khumbu and Lhotse valleys, Nepal**

**Yan Hu et al.**

*Correspondence to:* Yan Hu ([huyan@link.cuhk.edu.hk](mailto:huyan@link.cuhk.edu.hk))

The copyright of individual parts of the supplement might differ from the article licence.

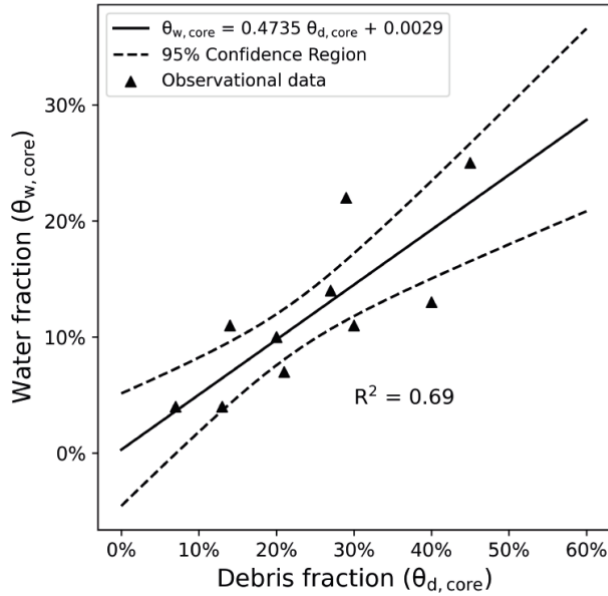

**Figure S1: Relationship between debris fraction ( $\theta_{d,core}$ ) and water fraction ( $\theta_{w,core}$ ).** The observational data are derived from the GPR and DGPS measurements in Monnier and Kinnard (2015b & 2016).

5

**Table S1. Parameters of the sensitivity experiments. Scn-1.0 (in *italic*) is the reference scenario that adopts the parameters of Murtèl rock glacier. The other scenarios are designed by multiplying the reference value of each variable with the corresponding factor in their scenario labels.**

| Scenario       | $A_{rg}$<br>(km <sup>2</sup> ) | W<br>(m)   | $\alpha$<br>(°) | $h_{al}$<br>(m) | $\rho_d$<br>(kg/m <sup>3</sup> ) | $\theta_{d,al}$<br>(%) | $\theta_{a,core}$<br>(%) |
|----------------|--------------------------------|------------|-----------------|-----------------|----------------------------------|------------------------|--------------------------|
| Scn-0.2        | 0.013                          | 40         | 3.2             | 0.6             | 1450                             | 13                     | 1.5                      |
| Scn-0.4        | 0.026                          | 80         | 6.4             | 1.2             | 1700                             | 26                     | 3.0                      |
| Scn-0.6        | 0.039                          | 120        | 9.6             | 1.8             | 1950                             | 39                     | 4.5                      |
| Scn-0.8        | 0.052                          | 160        | 12.8            | 2.4             | 2200                             | 52                     | 6.0                      |
| <i>Scn-1.0</i> | <i>0.065</i>                   | <i>200</i> | <i>16</i>       | <i>3.0</i>      | <i>2450</i>                      | <i>65</i>              | <i>7.5</i>               |
| Scn-1.2        | 0.078                          | 240        | 19.2            | 3.6             | 2700                             | 72                     | 9.0                      |
| Scn-1.4        | 0.091                          | 280        | 22.4            | 4.2             | 2950                             | 79                     | 10.5                     |
| Scn-1.6        | 0.104                          | 320        | 25.6            | 4.8             | 3200                             | 86                     | 12.0                     |
| Scn-1.8        | 0.117                          | 360        | 28.8            | 5.4             | 3450                             | 93                     | 13.5                     |

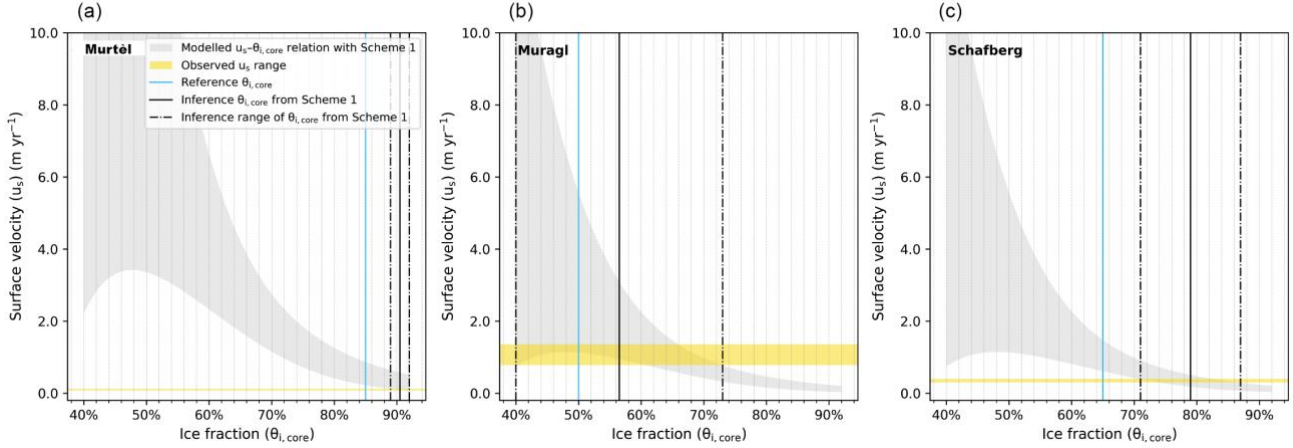

10 **Figure S2: Modelled relationships (grey shaded areas) between the ice fraction ( $\theta_{i,core}$ ) and the surface velocity ( $u_s$ ) of 95% confidence intervals for the three RGs monitored in the PERMOS network with model parameterisation Scheme 1. The ranges of the observed velocities (yellow bands) are used as velocity constraints for inferring ice content from the modelled relationships. Also shown are the reference ice content obtained from previous field-based surveys (blue lines). The inference ice contents are the mean values (solid black lines) with the estimated ranges (dash-dotted black lines).**

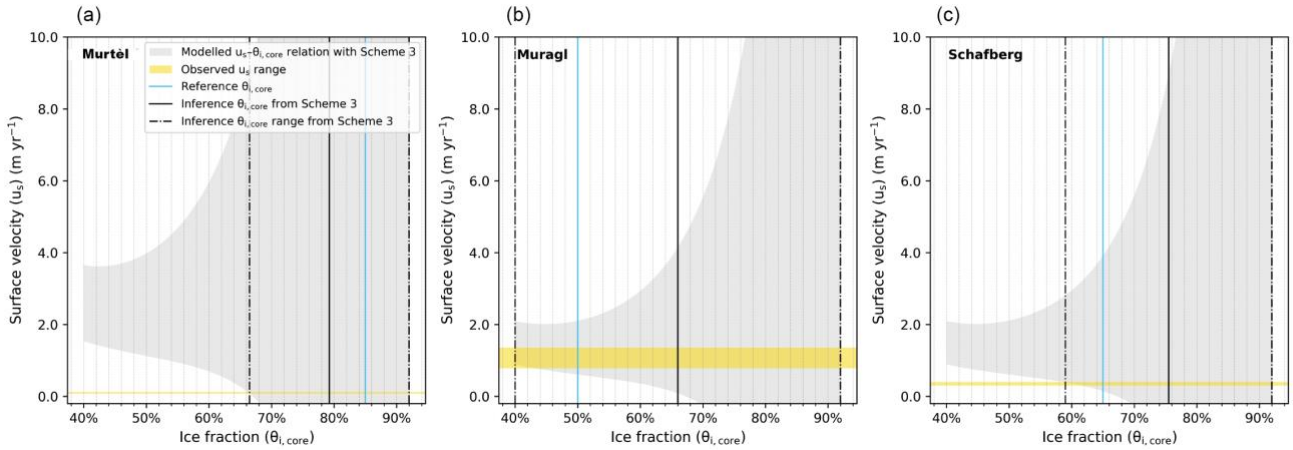

20 **Figure S3: Similar to Fig. S2, but showing results derived from model parameterisation Scheme 3. The grey shaded areas outline the modelled relationships between the ice fraction ( $\theta_{i,core}$ ) and the surface velocity ( $u_s$ ) with 95% confidence intervals. The yellow bands show the observed surface velocities, and the blue lines denote the reference ice contents. For each rock glacier, the intersection between the simulated  $\theta_{i,core}$  -  $u_s$  relationship (grey shaded area) and the observed velocity (yellow band) gives the estimated range of ice content, as marked by the dash-dotted black lines. The inferred ice content is taken as the average value of the estimated range and indicated by the solid black line.**

25 **Table S2: Estimated rock glacier thickness ( $T_{area}$ ) derived from the thickness–area relationship used in this study, and the corresponding bias relative to in situ measured thickness ( $T_{ref}$ ) (Barsch et al., 1979; Cicoira et al., 2019a; Arenson et al., 2002; Hoelzle et al., 1998). The rock glacier thickness ( $T_{slp}$ ) derived from thickness–slope angle relationship proposed by Cicoira et al. (2020), and the associated bias. The last row gives the mean absolute error (MAE) derived from the two methods.**

| Rock glacier | $T_{area}$ (m) | $T_{stp}$ (m) | $T_{ref}$ (m) |
|--------------|----------------|---------------|---------------|
| Murtèl       | 29             | 26.2          | 27            |
| Muragl       | 24             | 19            | 20            |
| Schafberg    | 24             | 20.8          | 25            |
| MAE          | 2.3            | 2             | –             |

30

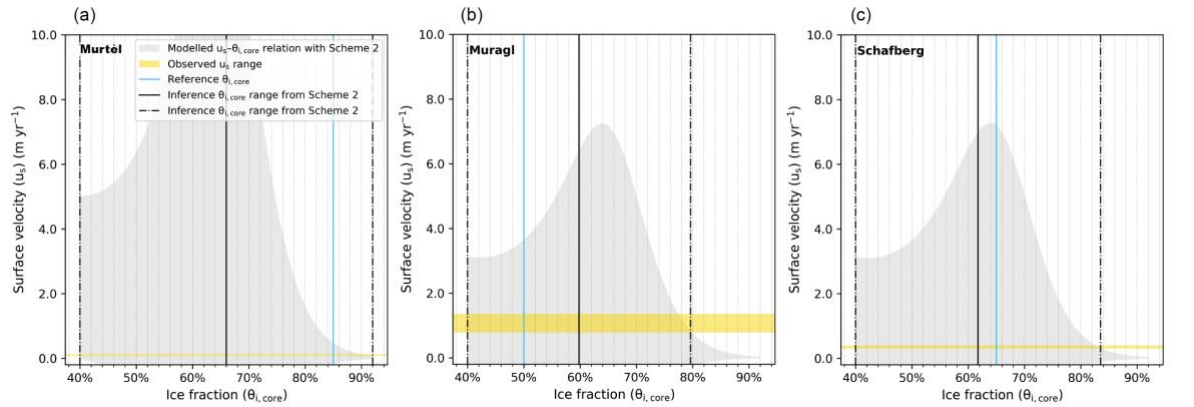

Figure S4: Modelled relationships (grey shaded areas) between the ice fraction ( $\theta_{i,core}$ ) and the surface velocity ( $u_s$ ) of 95% confidence intervals for the three RGs monitored in the PERMOS network assuming a thickness error of 6 m. The ranges of the observed velocities (yellow bands) are used as velocity constraints for inferring ice content from the modelled relationships. Also shown are the reference ice content obtained from previous field-based surveys (blue lines). The inference ice contents are the mean values (solid black lines) with the estimated ranges (dash-dotted black lines).

35

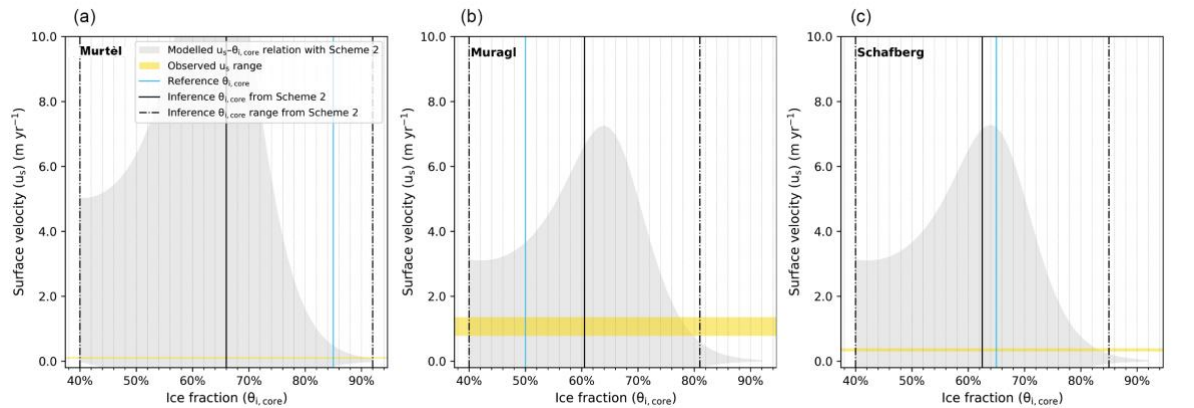

Figure S5: Similar to Fig. S4, but showing results with a thickness error of 10 m.

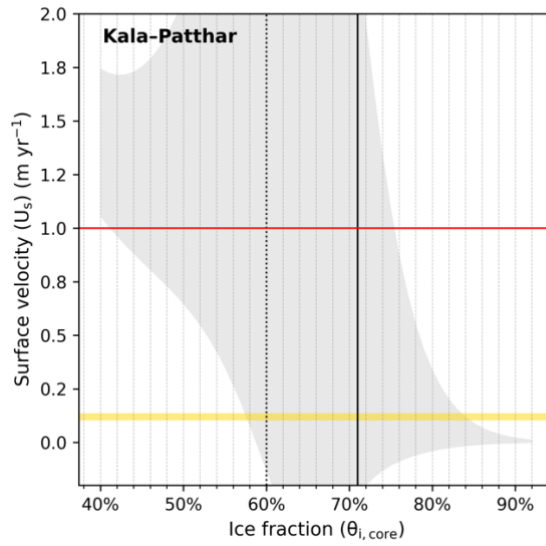

40 **Figure S6:** Modified after Fig. 9a in the manuscript. The yellow shading shows the observed surface velocity ( $\sim 0.1 \text{ m yr}^{-1}$ ) and the vertical solid black line denotes the modelled ice content (71%). The red shading marks an assumed surface velocity ( $1 \text{ m yr}^{-1}$ ) and the estimated ice fraction is shown by the vertical dotted line (60%).

45 **Table S3.** Summary of the reference and inference ice contents derived from two scenarios assuming different thickness errors, namely 6 m and 10 m. The values in brackets following the inference ice contents give the corresponding bias from the reference ice contents. The last row presents the root mean square error (RMSE) of the two scenarios.

| Rock glacier | Reference (%) | Inference and bias (%) |                      |
|--------------|---------------|------------------------|----------------------|
|              |               | 6-m thickness error    | 10-m thickness error |
| Murtèl       | 85            | 66 (-19)               | 66 (-19)             |
| Muragl       | 50            | 60 (10)                | 61 (11)              |
| Schafberg    | 65            | 62 (-3)                | 63 (-2)              |
| RMSE         | –             | 12                     | 13                   |
